# Supplementary material for: Factors Influencing Secondary Infertility: An Analysis of NFHS Data in India
Source: Research Square preprint supplement (doi:10.21203/rs.3.rs-5867449/v1), 2025-05-03
Supplement: Supplementary file 1 [file 7175658089a2bc96543d357f.docx]

Table 1: Background characteristics of sampled women for the study and prevalence of secondary infertility among WRA (20-49) in India, NFHS 5.

| **NFHS-5 (2019-21)** | | |
| --- | --- | --- |
| **Background characteristics WRA% % (20-49)**  **(N=420,751)** | | **Prevalence of infertility (Weighted% %)** |
| ***Biodemographic and socioeconomic factors*** | | |
| **Age (in years)** | | **𝛘2 =630.3, p-value:< 0.001** |
| 20-24 | 5.13 | 9.82 |
| 25-29 | 18.14 | 17.07 |
| 30-34 | 20.85 | 34.64 |
| 35-39 | 21.3 | 54.9 |
| 40-44 | 17.34 | 74.89 |
| 45-49 | 17.23 | 87.53 |
| Total |  |  |
| **Level of education** | | **𝛘2 =610.9, p-value:< 0.001** |
| No Education | 32.74 | 26.29 |
| Primary | 15.42 | 23.5 |
| Secondary | 43.34 | 28.08 |
| Higher | 8.5 | 35.74 |
| **Social Groups** | | **𝛘2 =636.48, p-value:< 0.001** |
| SC | 20.09 | 22.26 |
| ST | 18.72 | 31.8 |
| OBC | 40.94 | 26.3 |
| Other | 20.25 | 30.48 |
| **Religion** |  | **𝛘2 = 317.44, p-value:< 0.001** |
| Hindu | 76.95 | 7.91 |
| Muslim | 11.82 | 27.51 |
| Christian | 6.42 | 33.78 |
| Sikh | 2.27 | 32.87 |
| Other | 2.54 | 44.09 |
| **Household Wealth Index** | | **𝛘2 =450.67, p-value:< 0.001** |
| Poorest | 21.43 | 19.44 |
| Poorer | 22.1 | 24.14 |
| Middle | 20.73 | 29.61 |
| Richer | 18.96 | 35.79 |
| Richest | 16.78 | 41.79 |
| **Age at Marriage** | | **𝛘2 =455.07, p-value:< 0.001** |
| Less than 18 | 43.41 | 25.24 |
| 18 to 24 | 49.53 | 26.33 |
| 25 to 34 | 6.91 | 46.95 |
| 35 and above | 0.15 | 71.03 |
| **Menarche** | | **𝛘2 =9.71, p-value=0.002** |
| Less than 14 | 85.01 | 10.38 |
| More than 14 | 14.48 | 7.67 |
| Geographical Factors  ***Geographical Factors*** | | |
| **Residence** | | **𝛘2 =210.2, p-value:< 0.001** |
| Urban | 24.07 | 39.09 |
| Rural | 75.93 | 24.87 |
| **Region of Residence** | | **𝛘2 = 100.23, p-value:< 0.001** |
| North | 19.96 | 25.8 |
| Central | 22.83 | 21.05 |
| East | 17.05 | 20.41 |
| Northeast | 13.71 | 37 |
| West | 9.51 | 17.3 |
| South | 17 | 41.64 |
| **Currently Working** | | **𝛘2 = 145.99, p-value: 0.003** |
| No | 69.6 | 23.02 |
| Yes | 30.4 | 37.02 |
| **Alcohol Consumption** | | **𝛘2 = 125.72, p-value:< 0.001** |
| No | 97.67 | 27.87 |
| Yes | 2.33 | 38.66 |
| **Eat Fish** |  | **𝛘2 = 125.72, p-value:< 0.001** |
| Never | 33.74 | 25.07 |
| Daily | 4.55 | 51.14 |
| Weekly | 29.17 | 30.56 |
| Occasionally | 32.54 | 26.14 |
| **Smoke Paan/Tobacco** | | **𝛘2 = 17.92, p-value: 0.005** |
| No | 99 | 27.97 |
| Yes | 0.86 | 58.57 |
| **Smoke Cigarettes** | | **𝛘2 =18.99, p-value: 0.004** |
| Does Not Smoke | 99.79 | 27.97 |
| Yes | 0.21 | 58.57 |
| ***Health Related Factors*** | | |
| **BMI** |  | **𝛘2 = 1205.3, p-value:< 0.001** |
| Underweight | 12.08 | 16.73 |
| Normal Weight | 59.02 | 26.3 |
| Overweight | 21.71 | 41.53 |
| Obese | 7.19 | 49.58 |
| **Currently Hypertension** | | **𝛘2 = 291.47, p-value:< 0.001** |
| No | 92.91 | 27.65 |
| Yes | 6.28 | 37.841 |
| **Currently thyroid** | | **𝛘2 = 180.54, p-value:< 0.001** |
| No | 96.26 | 27.32 |
| Yes | 3.02 | 54.2 |
| **Has diabetes** | | **𝛘2 = 229.06, p-value: 0.001** |
| No | 96.47 | 27.63 |
| Yes | 2.3 | 47.79 |
| **Has cancer** | | **𝛘2 = 16.95, p-value:< 0.001** |
| No | 99.36 | 27.71 |
| Yes | 0.15 | 36.17 |
| **Any STI in last 12 months** | | **𝛘2 = 65.28, p-value:< 0.001** |
| No | 94.87 | 26.8 |
| Yes | 5.06 | 21.34 |
| **Genital Ulcer in last 12 months** | | **𝛘2 = 45.25, p-value:< 0.001** |
| No | 95.15 | 25.94 |
| Yes | 4.62 | 28.41 |
|  |  |  |

Table 2. Construction of dependent variables for infertility (NFHS 2019-21).

| **Variable name in STATA** | | **Description (with codes)** |
| --- | --- | --- |
| V013 | Age (in years) | Age of women was divided into two categories: ‘15-  19 years’ (coded as ‘1’),20-49 years (coded as ‘2’). |
| V501 | Marital status | Marital status is divided into two categories:  ‘Currently married’ (coded as ‘1’),’ not married’, and ‘formerly married’ (coded as ‘2’) |
| V513 | Cohabitation duration | Union duration status is divided into two categories:  ‘Never married’ (coded as ‘1’), ‘0-4’ (coded as ‘2’), ‘5-29’ (coded as ‘2’). |
| V312 | Contraceptive method | Current contraceptive method has been divided into two categories: ‘not using’ (coded as ‘1’), and others, including pill, IUD, injections, etc. (coded as ‘2’) |
| V213 | Currently pregnant | Pregnancy status has two categories: ‘not pregnant’ (coded as ‘1’), ‘pregnant’(coded as ‘1’) |
| V228 | Terminated pregnancy | Terminated pregnancy has two categories: ‘no ever-terminated pregnancy’ (coded as ‘1’), ‘yes ever had a terminated pregnancy’ (coded as ‘1’). |
| V208 | Births in the last five years | Last five years birth status has two categories: ‘no births’ (coded as ‘1’), ‘1-4’ (coded as ‘1’), ‘5-6’ (coded as ‘2’). |
| V605 Desire for more children | | Desire for more children status was divided into three categories: ‘wants within 2 years’ ‘wants after 2 years’ ‘wants, unsure timing’ (coded as ‘1’),  ‘undecided’ (coded as ‘2’), ‘no more’ ‘sterilized’  ‘Declared infecund’ and ‘never had sex’ (coded as ‘3’) |

Source: India’s National Family Health Survey

Table 3: Unadjusted and adjusted odds ratios (with 95% Cl) for secondary infertility among WRA (20-49) in India,2019-21 (n=12894)

| **NFHS-5 (2019-21)** | | | | | | | | | |
| --- | --- | --- | --- | --- | --- | --- | --- | --- | --- |
| **Model 1 Model 2** | | | | | | | | | |
| **Background characteristic** | **UOR [95% CL]** | | **AOR [95% CL] *p-value* AOR [95% CL]** | | | | | | |
| ***Biodemographic and socioeconomic factors*** | | | | | | | |  | |
| **Age** |  |  |  |  | | |  |  | |
| 20-24 ® | 1 |  |  |  | | |  |  | |
| 25-29 | 0.69**(0.63,0.76) |  | 0.65**(0.63,0.73) |  | | | 1.49**(1.12,1.96) |  | |
| 30-34 | 2.67**(2.48,2.88) |  | 2.51**(2.42,2.79) |  | | | 3.44 (2.75,4.31) |  | |
| 35-39 | 3.43***(3.18,3.69) |  | 3.01**(3.10,3.53) |  | | | 3.91***(3.15,4.86) |  | |
| 40-44 | 2.78***(2.58,3) |  | 2.42***(2.39,2.99) |  | | | 2.91***(2.33,3.63) |  | |
| 45-49 | 1.69***(1.55,1.84) |  | 1.55***(1.35,1.76) |  | | | 2.13**8(1.68,2.7) |  | |
| **Level of education** |  |  |  |  | | |  |  | |
| No education® | 1 |  |  |  | | |  |  | |
| Primary | 0.97 (0.91,1.03) |  | 0.57 (0.26,1.27) |  | | | 0.91 (0.77,1.08) |  | |
| Secondary | 1.1***(1.05,1.15) |  | 0.84 (0.49,1.42) |  | | | 0.96 (0.84,1.1) |  | |
| Higher | 0.85**8(0.8,0.9) |  | 0.93 (0.38,2.31) |  | | | 0.96 (0.78,1.18) |  | |
| **Social groups** |  |  |  |  | | |  |  | |
| SC® | 1 |  |  |  | | |  |  | |
| ST | 1.62***(1.53,1.71) |  | 1.37**8(1.15,1.63) |  | | | 0.57 (0.26,1.27) |  | |
| OBC | 1.11**8(1.06,1.17) |  | 1(0.87,1.16) |  | | | 0.84 (0.49,1.42) |  | |
| Other | 0.97(0.69,0.98) |  | 0.82(0.69,0.98) |  | | | 0.93 (0.38,2.31) |  | |
| **Religion** |  |  |  |  | | |  |  | |
| Hindu® | 1 |  |  |  | | |  |  | |
| Muslim | 1.25***(1.19,1.32) |  | 0.83 (0.38,1.83) |  | | | 1.5***(1.28,1.76) |  | |
| Christian | 1.71***(1.62,1.82) |  | 2.59 (1.07,6.26) |  | | | 1.44**(1.17,1.79) |  | |
| Sikh | 0.93*(0.82,1.05) |  | 1.17 (0.15,9.48) |  | | | 0.79 (0.5,1.26) |  | |
| Other | 1.7***(1.55,1.86) |  | 0.84 (0.19,3.66) |  | | | 1.17 (0.87,1.58) |  | |
| **Household wealth index** |  |  |  |  | | |  |  | |
| Poorest® | 1 |  |  |  | | |  |  | |
| Poorer | 0.89***(0.78,1.07) |  | 1.16 (0.66,2.04) |  | | | 0.91(0.78,1.07) |  | |
| Middle | 0.92**(0.8,1.13) |  | 1.36 (0.74,2.5) |  | | | 0.95 (0.8,1.13) |  | |
| Richer | 0.99 (0.88,1.28) |  | 1.12 (0.53,2.35) |  | | | 1.06 (0.88,1.28) |  | |
| Richest | 0.93*(0.76,1.19) |  | 0.3*(0.08,1.15) |  | | | 0.95 (0.76,1.19) |  | |
| **Age at marriage** |  |  |  |  | | |  |  | |
| Before 18® | 1 |  |  |  | | |  |  | |
| Age 18 to 24 | 1.18***(1.14,1.23) |  | 1.14**(1.02,1.27) |  | | | 0.14** (0.09,0.23) |  | |
| Age 25 to 34 | 1.91***(1.8,2.02) |  | 1.6***(1.34,1.9) |  | | | 1.32*** (1.28,1.40) | |  |
| After age35 | 2.82***(2.24,3.54) |  | 4.01***(2.24,7.18) |  | | | 4.22***(3.01,7.18) |  | |
| **Menarche** |  |  |  |  | | |  |  | |
| Before age 15® | 1 |  |  |  | | |  |  | |
| After age15 | 0.69***(0.55,0.80) |  | 0.6* (0.32,1.13) |  | | | 0.64**(0.52,0.78) |  | |
| ***Geographical factors*** |  |  |  |  | | |  |  | |
| **Place of residence** |  |  |  |  | | |  |  | |
| Urban ® | 1 |  |  |  | | |  |  | |
| Rural | 0.85***(0.82,0.88) |  | 0.94 (0.82,1.06) |  | | | 0.74 (0.43,1.25) |  | |
| **Region of residence** |  |  |  |  | | |  |  | |
| North ® | 1 |  |  |  | | |  |  | |
| Central | 1.14***(1.07,1.21) |  | 1.14*(0.54,2.4) | |  | 1.39***(1.16,1.68) | |  | |
| East | 1.15***(1.08,1.23) |  | 1.16*(0.52,2.59) | |  | 1.32*(1.08,1.62) | |  | |
| Northeast | 1.69***(1.59,1.8) |  | 0.42*(0.13,1.33) | |  | 1.22*(0.96,1.54) | |  | |
| West | 1.49***(1.39,1.6) |  | 1.91*(0.84,4.33) | |  | 1.78***(1.45,2.19) | |  | |
| South | 1.77***(1.67,1.88) |  | 1.66*(0.75,3.68) | |  | 2***(1.67,2.39) | |  | |
| ***Behavioral factors*** |  |  |  |  | | |  |  | |
| **Alcohol consumption** |  |  |  |  | | |  |  | |
| No ® | 1 |  |  |  | | |  |  | |
| Yes | 1.19**(1.07,1.34) |  | 4.44*(1.46,13.51) |  | | | 1.05(0.77,1.42) |  | |
| **Eat Fish** |  |  |  |  | | |  |  | |
| Never® | 1 |  |  |  | | |  |  | |
| Daily | 2.13***(1.98,2.29) |  | 1.41(0.5,3.94) |  | | |  |  | |
| Weekly | 1.39***(1.32,1.45) |  | 0.94(0.53,1.68) |  | | |  |  | |
| Occasionally | 1.32***(1.26,1.38) |  | 0.86(0.51,1.47) |  | | |  |  | |
| **Consumption of tobacco in any form** |  |  |  |  | | |  |  | |
| No tobacco® | 1 |  |  |  | | |  |  | |
| Yes | 1.71***(1.47,2) |  | 1.36(0.17,10.72) |  | | | 1.4*(0.94,2.08) |  | |
| **Smoke cigarettes** |  |  |  |  | | |  |  | |
| No cigarettes ® | 1 |  |  |  | | |  |  | |
| Yes | 2.94***(2.32,3.71) |  | 2.13*(0.92,4.92) |  | | |  |  | |
| ***Health related factors*** |  |  |  |  | | |  |  | |
| **Body mass index** |  |  |  |  | | |  |  | |
| Underweight ® | 1 |  |  |  | | |  |  | |
| Normal weight | 1.65***(1.55,1.75) |  | 1.19(0.73,1.94) |  | | | 1.09 (0.93,1.27) |  | |
| Overweight | 2.22***(2.08,2.37) |  | 1.4 (0.69,2.87) |  | | | 1.32**(1.1,1.58) |  | |
| Obesity | 2.44***(2.24,2.65) |  | 3.31*(1.26,8.66) |  | | | 1.41**(1.11,1.78) |  | |
| **Has Hypertension** |  |  |  |  | | |  |  | |
| No ® | 1 |  |  |  | | |  |  | |
| Yes | 0.93*(0.85,1.01) |  |  |  | | |  |  | |
| **Currently thyroid** |  |  |  |  | | |  |  | |
| No® | 1 |  |  |  | | |  |  | |
| Yes | 1.55***(1.41,1.69) |  | 3.29**(1.21,8.93) |  | | | 1.63***(1.28,2.09) |  | |
| **Has Diabetes** |  |  |  |  | | |  |  | |
| No ® | 1 |  |  |  | | |  |  | |
| Yes | 0.92(0.81,1.05) |  |  |  | | |  |  | |
|  |  |  |  |  | | |  |  | |

Note: ®: Reference category ***: 99% significance level **: 95% significance level *: 90% significance level

Note: Model 1 (adjusted with proposed variables) had a lower likelihood compared to Model 2, which only included significant variables from Model 1 (without the proposed variables), indicating that Model 1 is better than Model 2. [Model 1 has a higher (i.e., less negative) log-likelihood compared to Model 2, suggesting that Model 1 provides a better fit to the data.]
