# Supplementary material for: Factors Influencing Secondary Infertility: An Analysis of NFHS Data in India
Source: Research Square preprint supplement (doi:10.21203/rs.3.rs-5867449/v1), 2025-05-03
Supplement: Supplementary file 2 [file 8a4bb618e71f776319eb0fa5.docx]

Supplementary Files

Labels for all figures

**Figure 1:** Process of sample selection for the study from NFHS-5

**Figure 2:** Conceptual framework showing determinants of secondary infertility among women (aged 20-49) in India

**Figure 3:** Measurement of secondary infertility

**Figure 4**: Trend in the Prevalence of Secondary Infertility in India: NFHS-1 (1992–93) to NFHS-5 (2019–21)

**Figure 5:** Variation in the Prevalence of Secondary Infertility (%) Among Women Across Indian States: NFHS-4 (2015–16) and NFHS-5 (2019–21)
